# Supplementary material for: Nocardiopsistins A-C: New angucyclines with anti-MRSA activity isolated from a marine sponge-derived Nocardiopsis sp. HB-J378
Source: PubMed Central journal article supplement — Synth Syst Biotechnol. 2018 Nov 2;3(4):246–51. doi: 10.1016/j.synbio.2018.10.008 (PMC6223224; doi:10.1016/j.synbio.2018.10.008), 2018-11-02
Supplement: mmc1.pdf [file mmc1.pdf]

1 **Supplementary Information**

2  
3 **Nocardiopsistins A-C: new angucyclines with anti-MRSA activity isolated from a marine**  
4 **sponge-derived *Nocardiopsis* sp. HB-J378.**

5  
6 Dongbo Xu<sup>1</sup>, Keshav K. Nepal<sup>1</sup>, Jing Chen<sup>2</sup>, Dedra Harmody<sup>1</sup>, Haining Zhu<sup>2</sup>, Peter J. McCarthy<sup>1</sup>,  
7 Amy E. Wright<sup>1</sup>, and Guojun Wang<sup>1\*</sup>

8  
9 <sup>1</sup>Harbor Branch Oceanographic Institute, Florida Atlantic University, 5600 US 1 North, Fort Pierce,  
10 FL, United States 34946; <sup>2</sup>Department of Molecular and Cellular Biochemistry, University of  
11 Kentucky, 741 South Limestone, Lexington, KY, United States 40536.

12  
13 \*Corresponding author: Guojun Wang

14 Email: [guojunwang@fau.edu](mailto:guojunwang@fau.edu)

15 Tel: +1-772-242-2423

16

# 1 Supplementary Figures

2

## 3 Figure S1. HRESI-MS data (A) and UV spectrum (B) of compound 1.

4

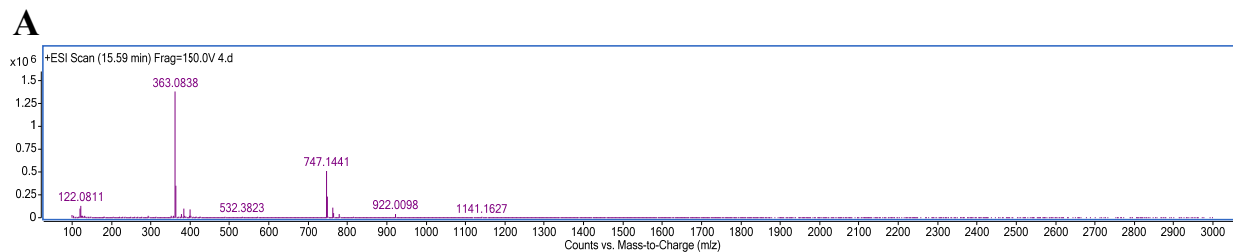

5

6

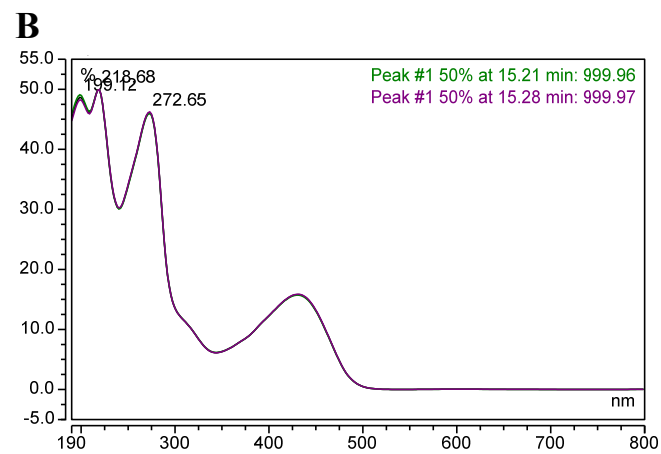

7



1 **Figure S3.**  $^{13}\text{C}$  NMR of **1** in  $\text{CDCl}_3$  (150 MHz) (*50.9* is from methanol).

2

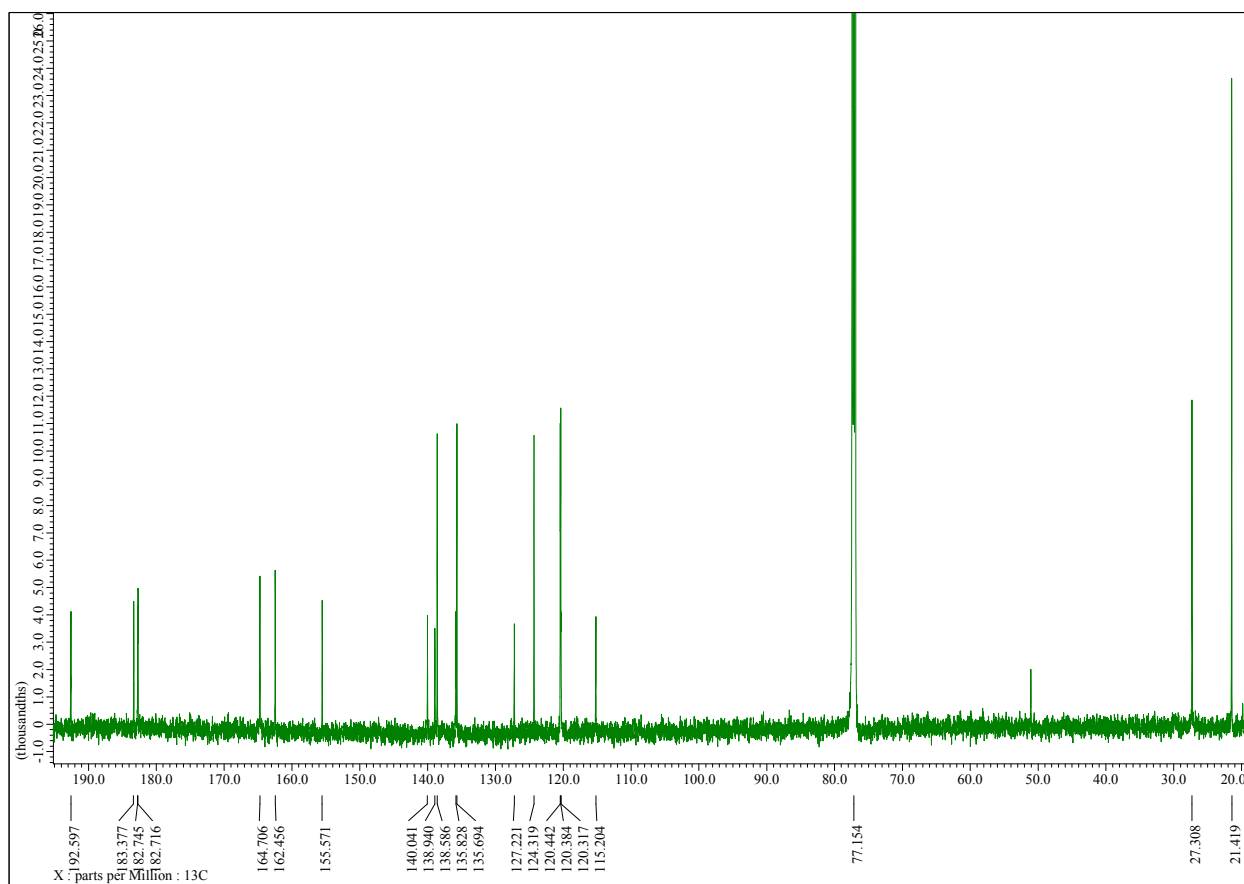

3

4

5

1 **Figure S4.** 2D-g COSY spectrum of **1** in CDCl<sub>3</sub>.

2

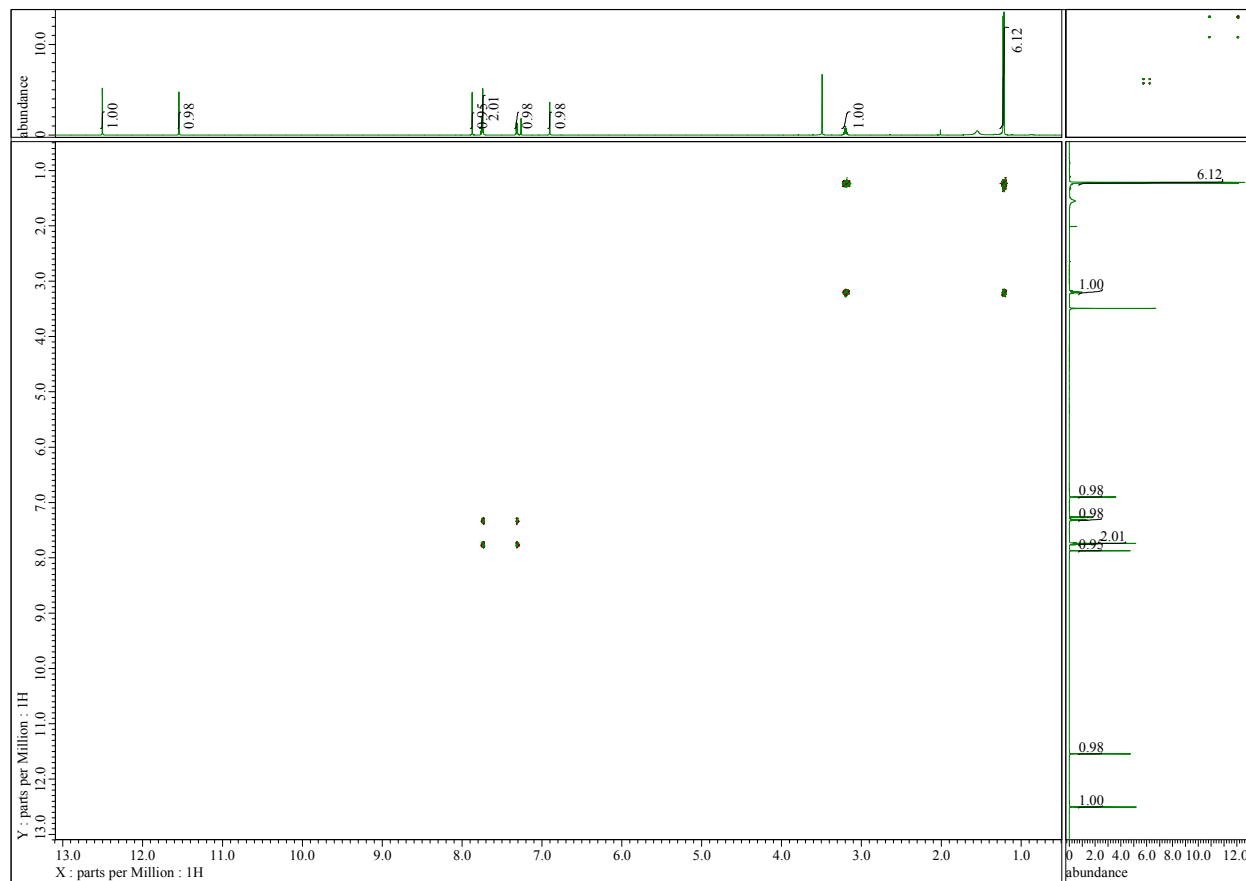

1 **Figure S5.** 2D-gHSQC of **1** spectrum in CDCl<sub>3</sub>.

2

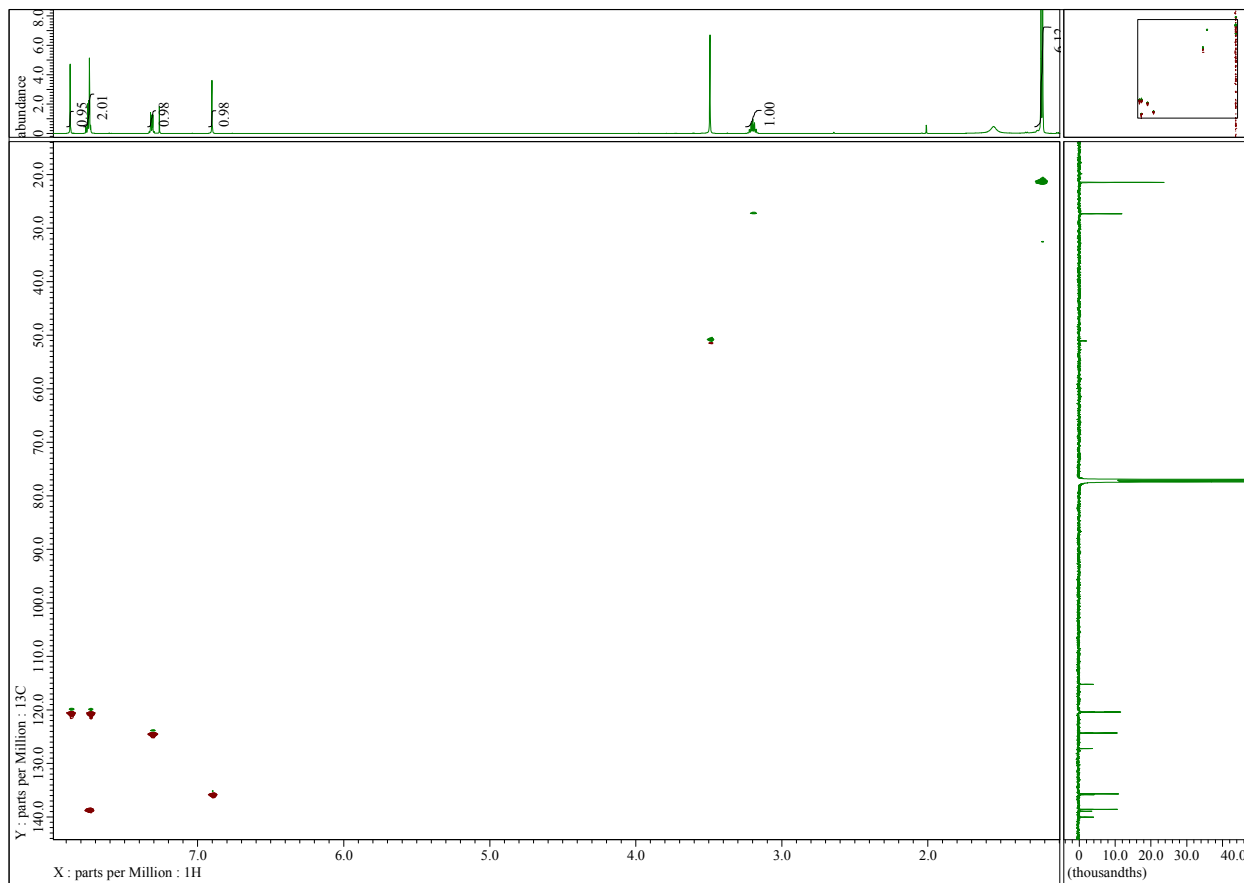

3

4

5

1 **Figure S6.** 2D-gHMBC spectrum of **1** in CDCl<sub>3</sub>.

2

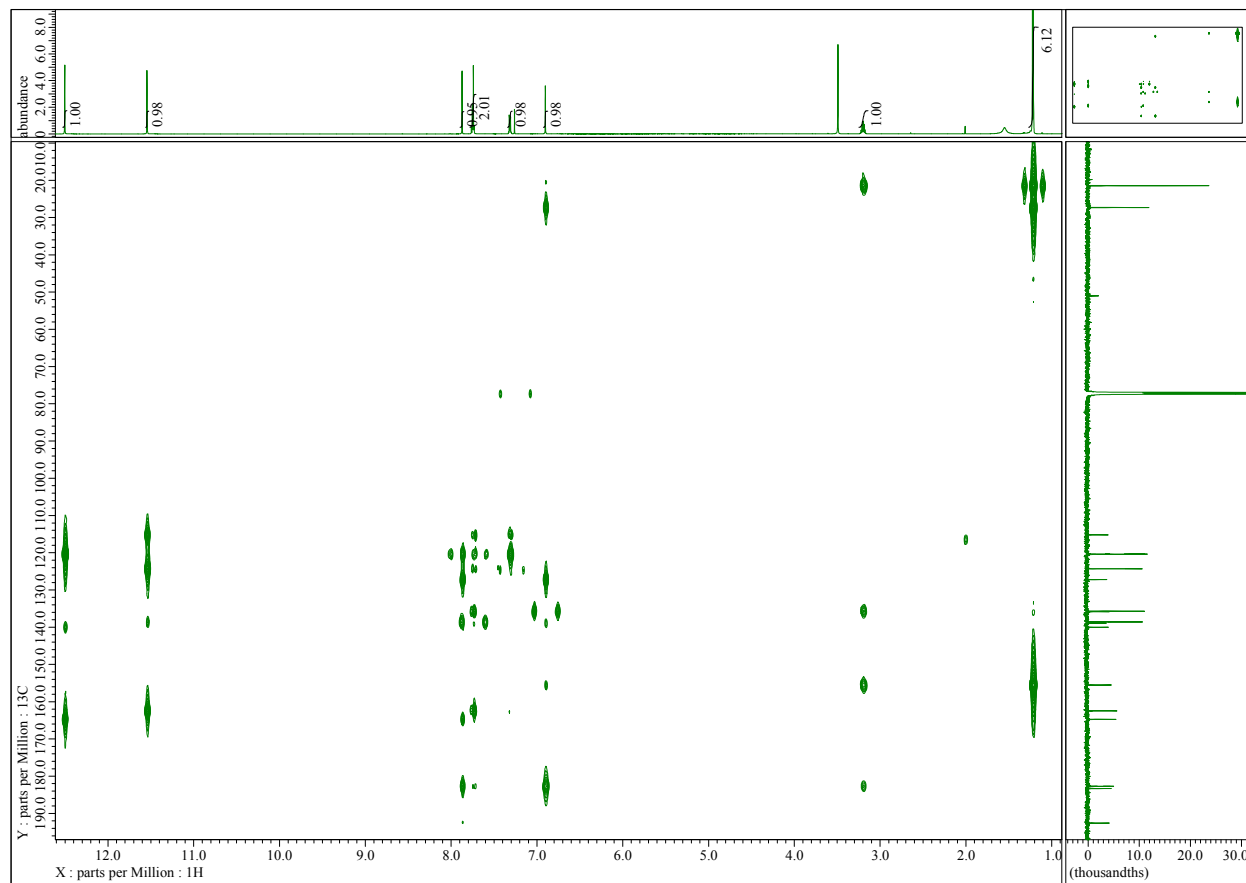

1 **Figure S7. HRESI-MS data (A) and UV spectrum (B) of compound 2.**

2

**A**

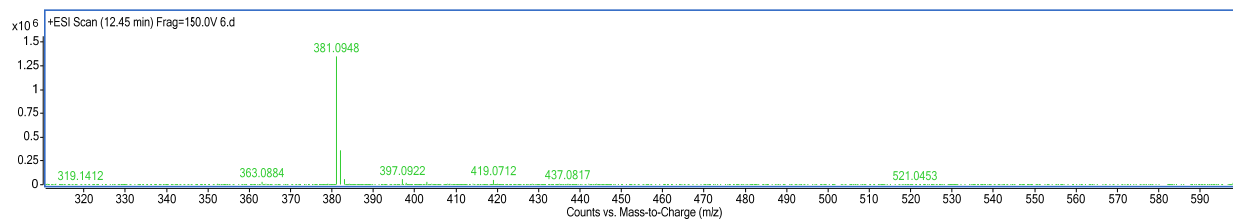

3

4

**B**

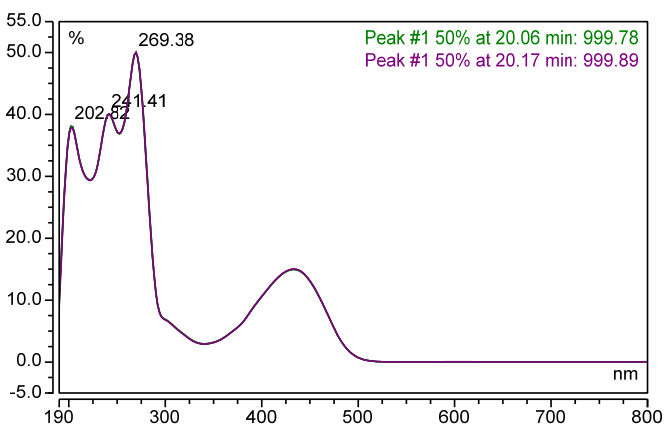



1 **NMR data of compound 2.**

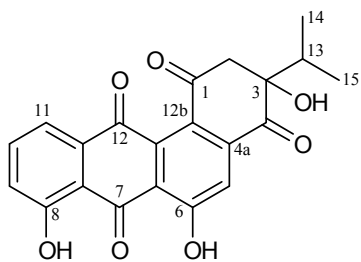

2 Nocardiosistin B (2)

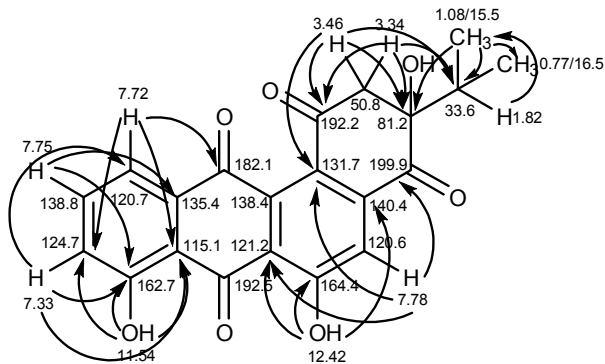

3 Chemical Shifts and HMBC correlations for  
4 nocardiosistin B observed in CDCl<sub>3</sub>

5 **Figure S8.** <sup>1</sup>H NMR of 2 in CDCl<sub>3</sub> (600 MHz) (5.30 s is from dichloromethane).

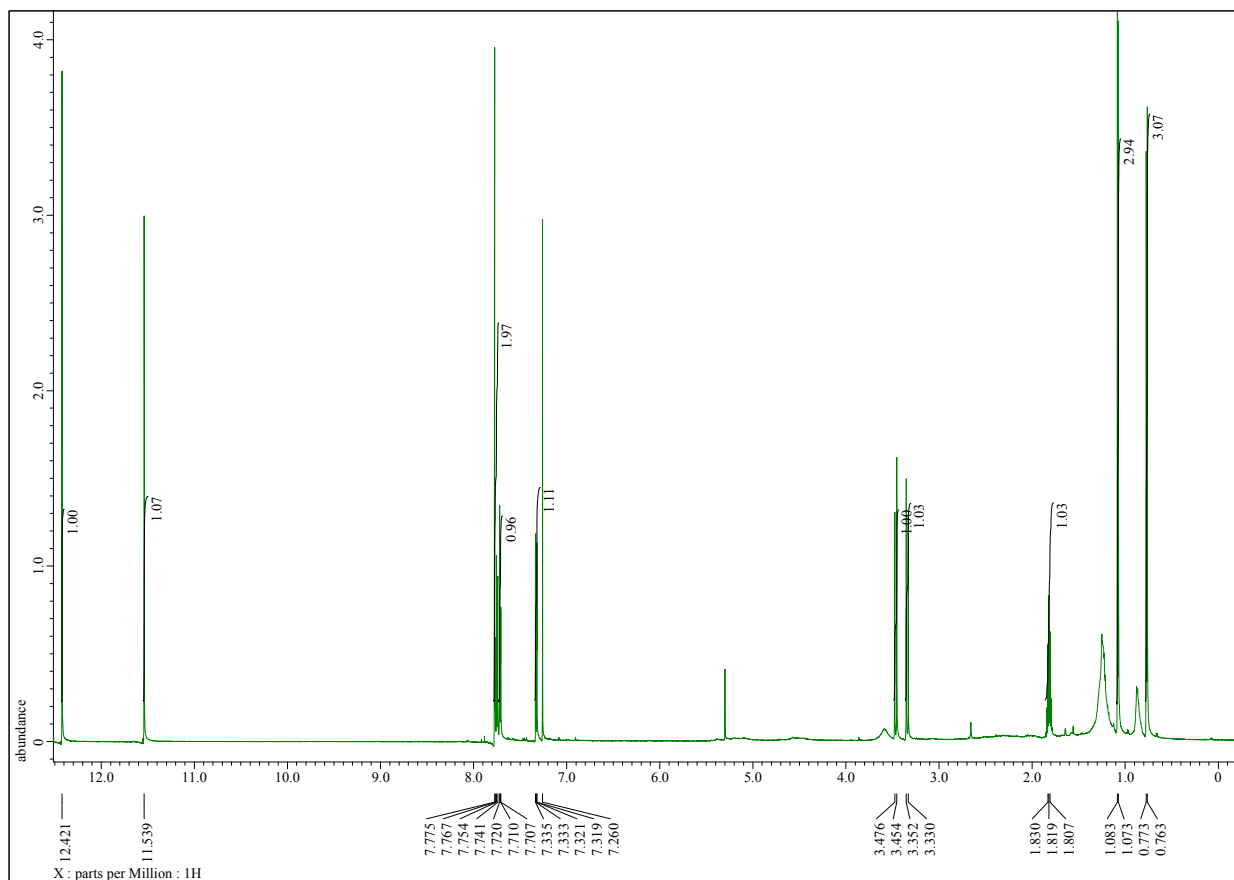

1 **Figure S9.**  $^{13}\text{C}$  NMR of **2** in  $\text{CDCl}_3$  (150 MHz) (*50.9* is from methanol).

2

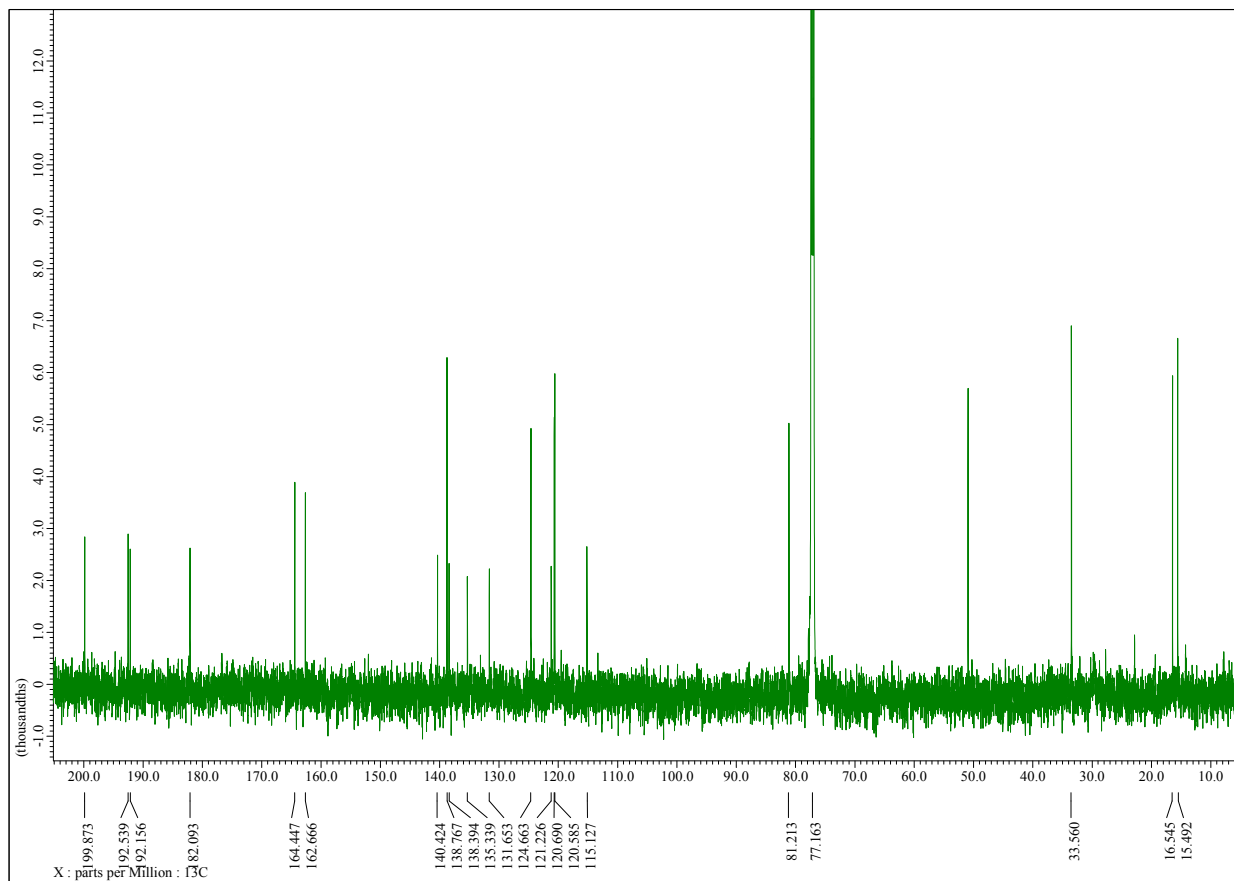

3

4

5

1 **Figure S10.** 2D-gCOSY spectrum of **2** in CDCl<sub>3</sub>.

2

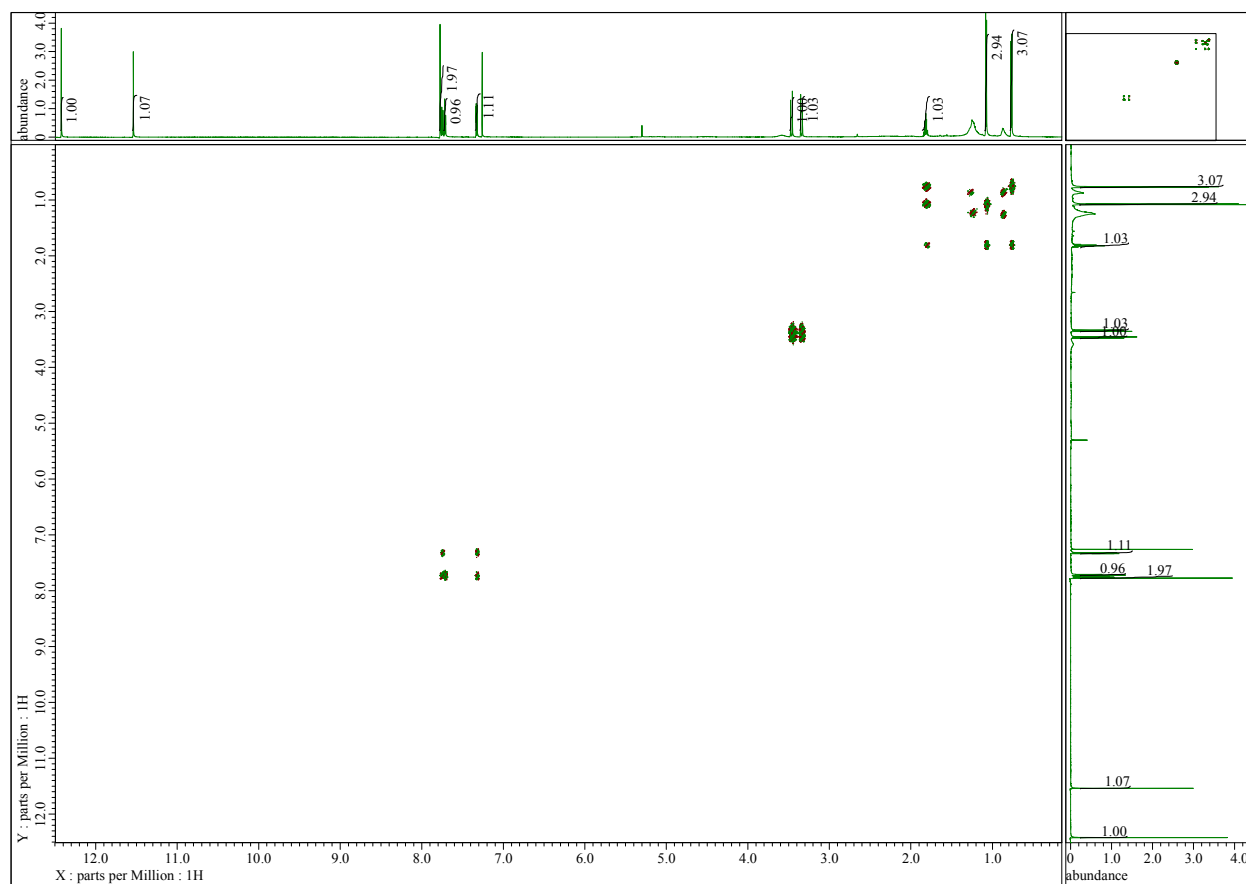

1 **Figure S11.** 2D-gHSQC spectrum of **2** in CDCl<sub>3</sub>.

2

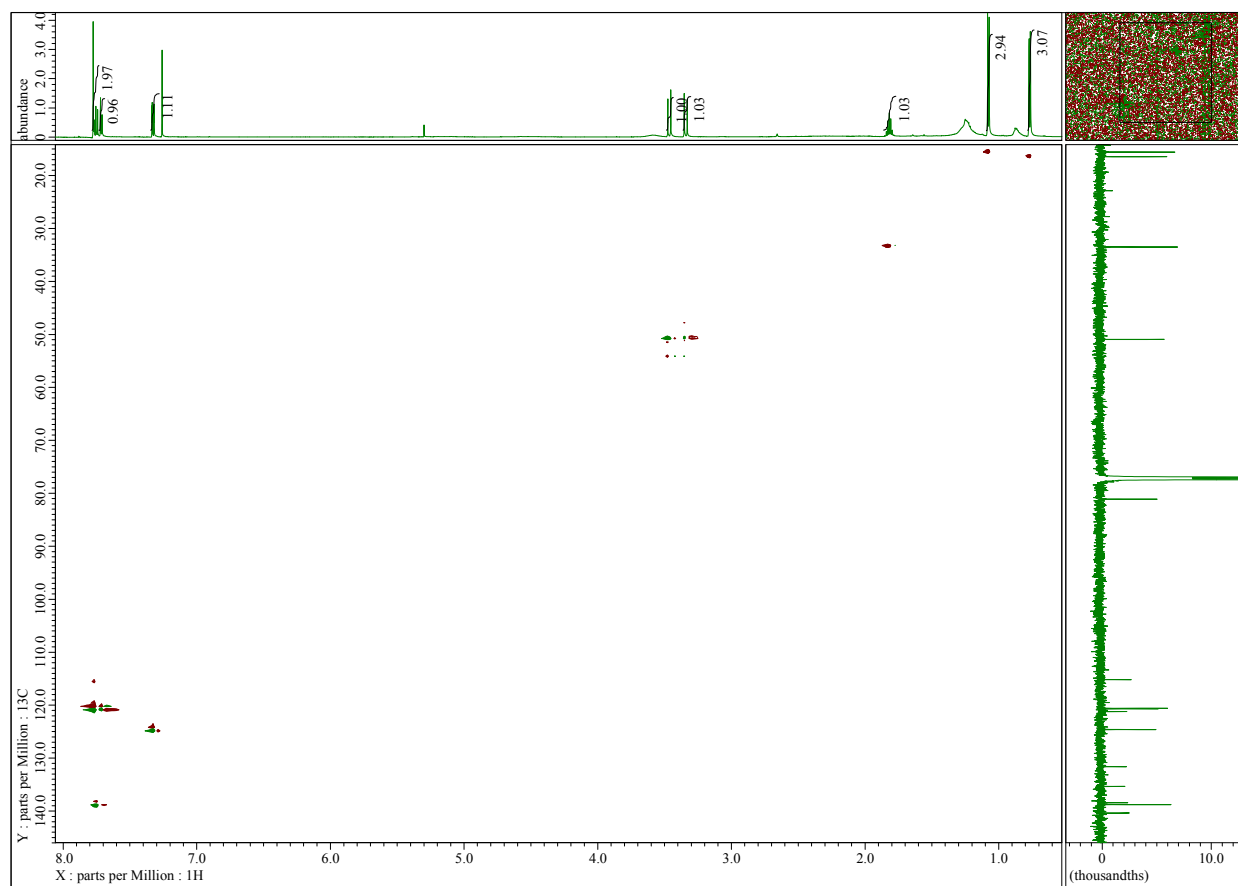

3

4

5

1 **Figure S12.** 2D-gHMBC spectrum of **2** in CDCl<sub>3</sub>.

2

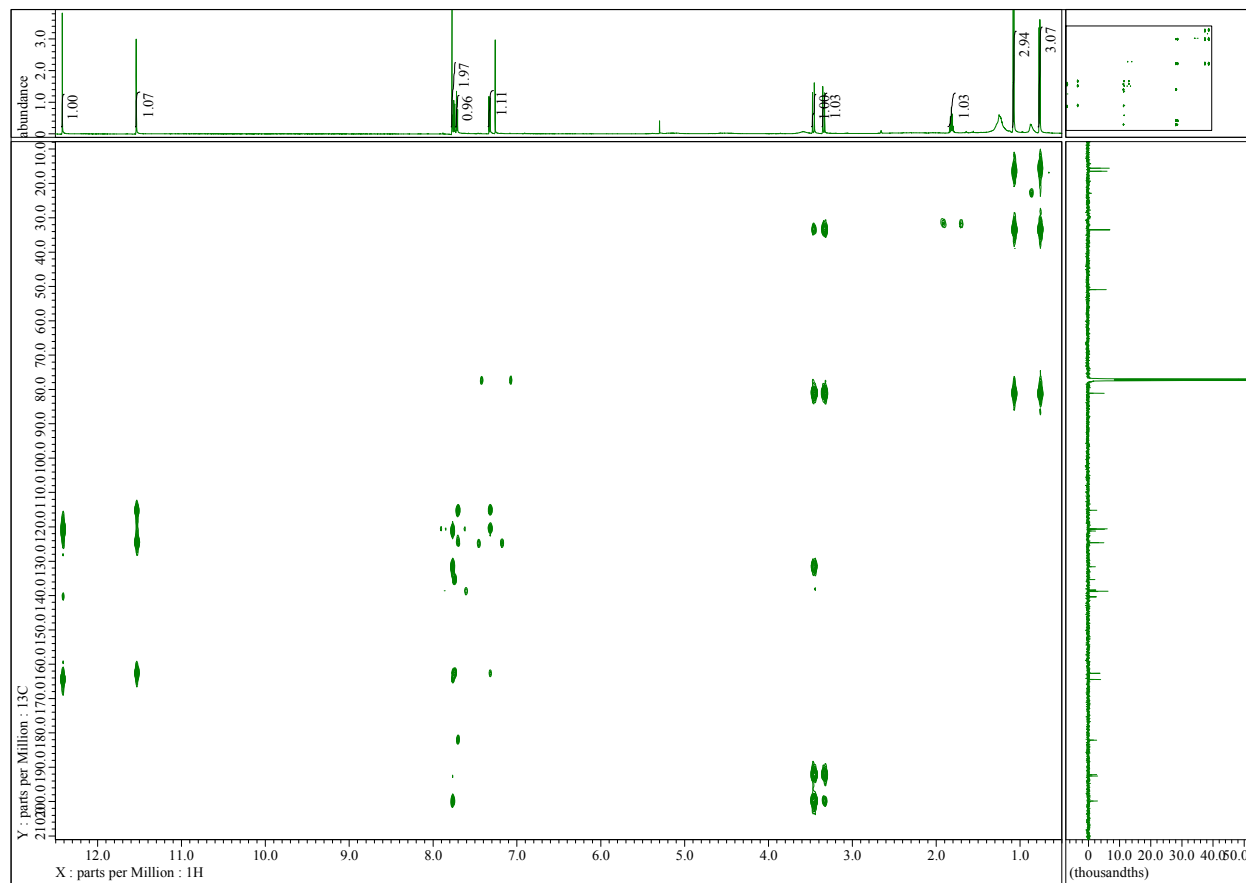

3

4

5

6

1 **Figure S13.** HRESI-MS data (A) and UV spectrum (B) of compound 3.

2

**A**

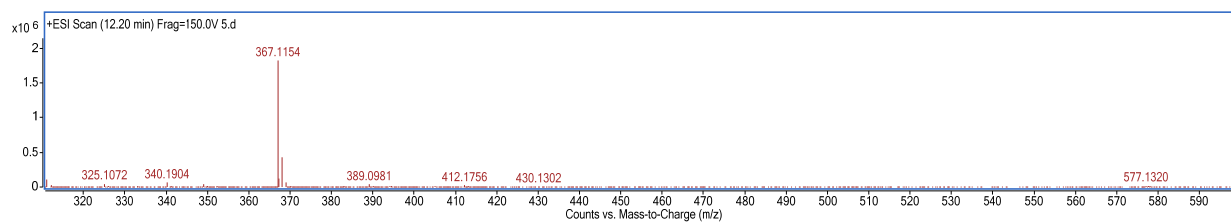

4

**B**

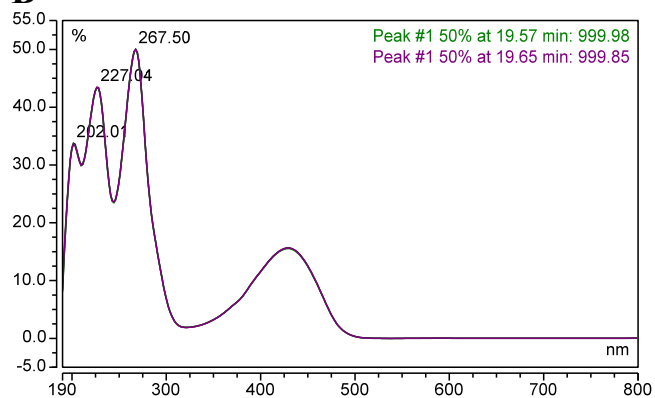

1 **NMR data of compound 3.**

2

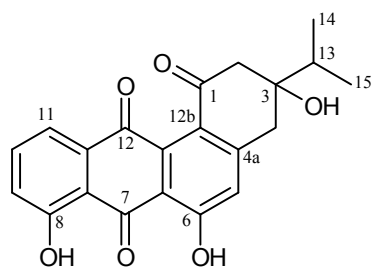

3

4

Nocardiosistin C (**3**)

5

6

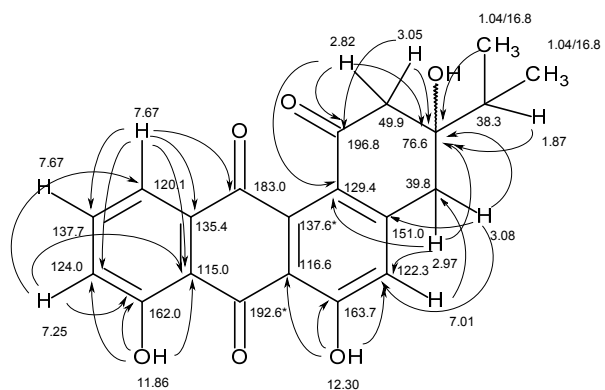

Chemical Shifts and HMBC correlations for nocardiosistin C observed in CDCl<sub>3</sub>

7 **Figure S14.** <sup>1</sup>H NMR of **3** in CDCl<sub>3</sub> (600 MHz).

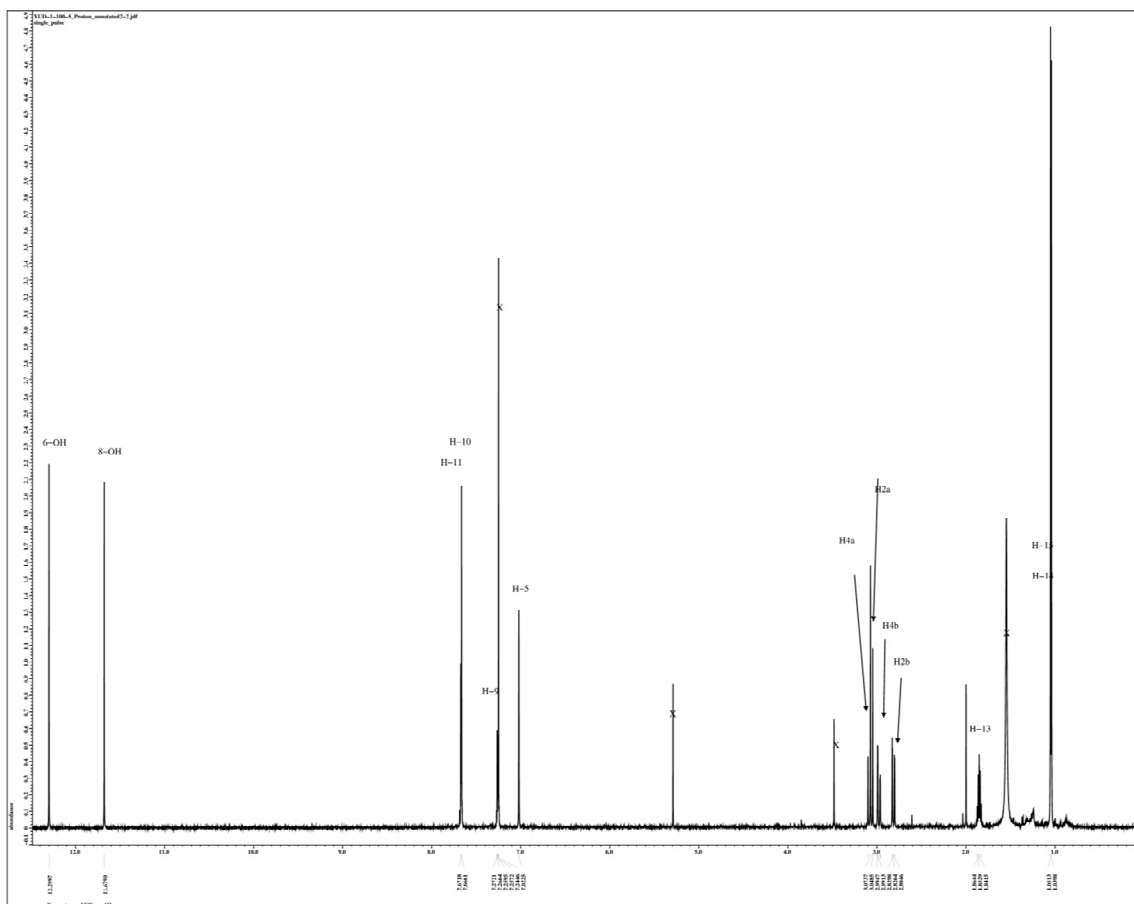

8

9

1 **Figure S15.**  $^{13}\text{C}$  NMR of **3** in  $\text{CDCl}_3$  (150 MHz).

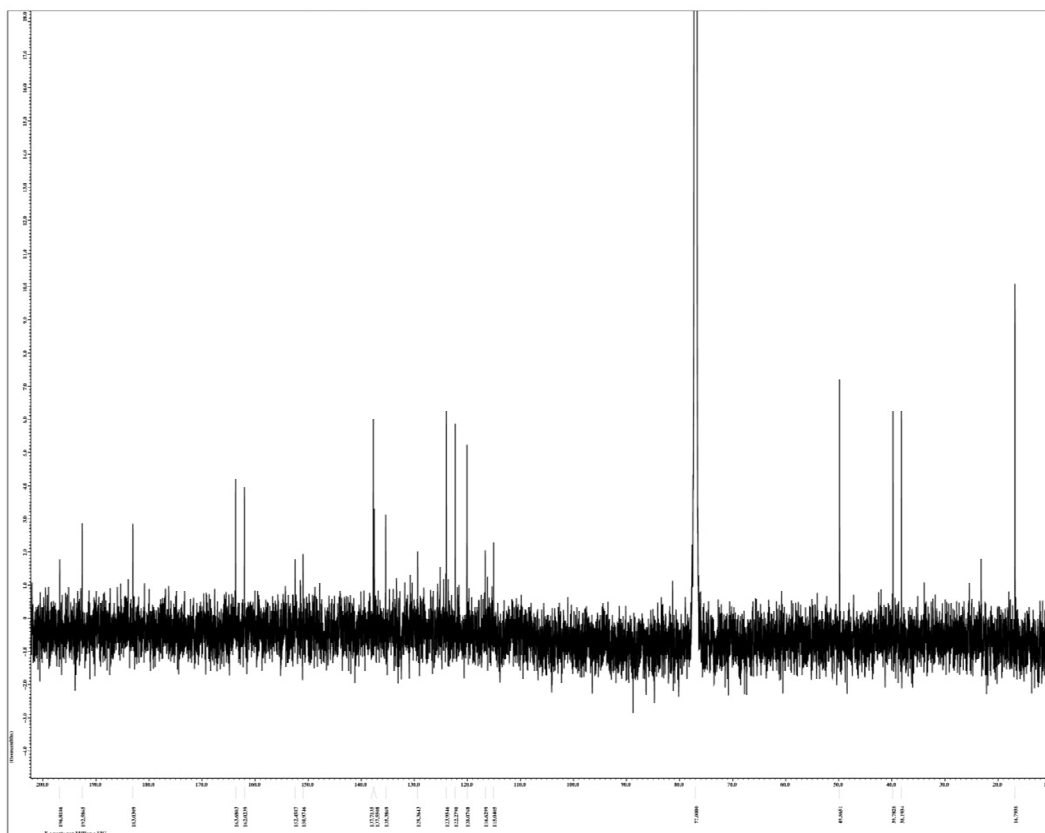



1 **Figure S16.** 2D-gCOSY spectrum of **3** in CDCl<sub>3</sub>.

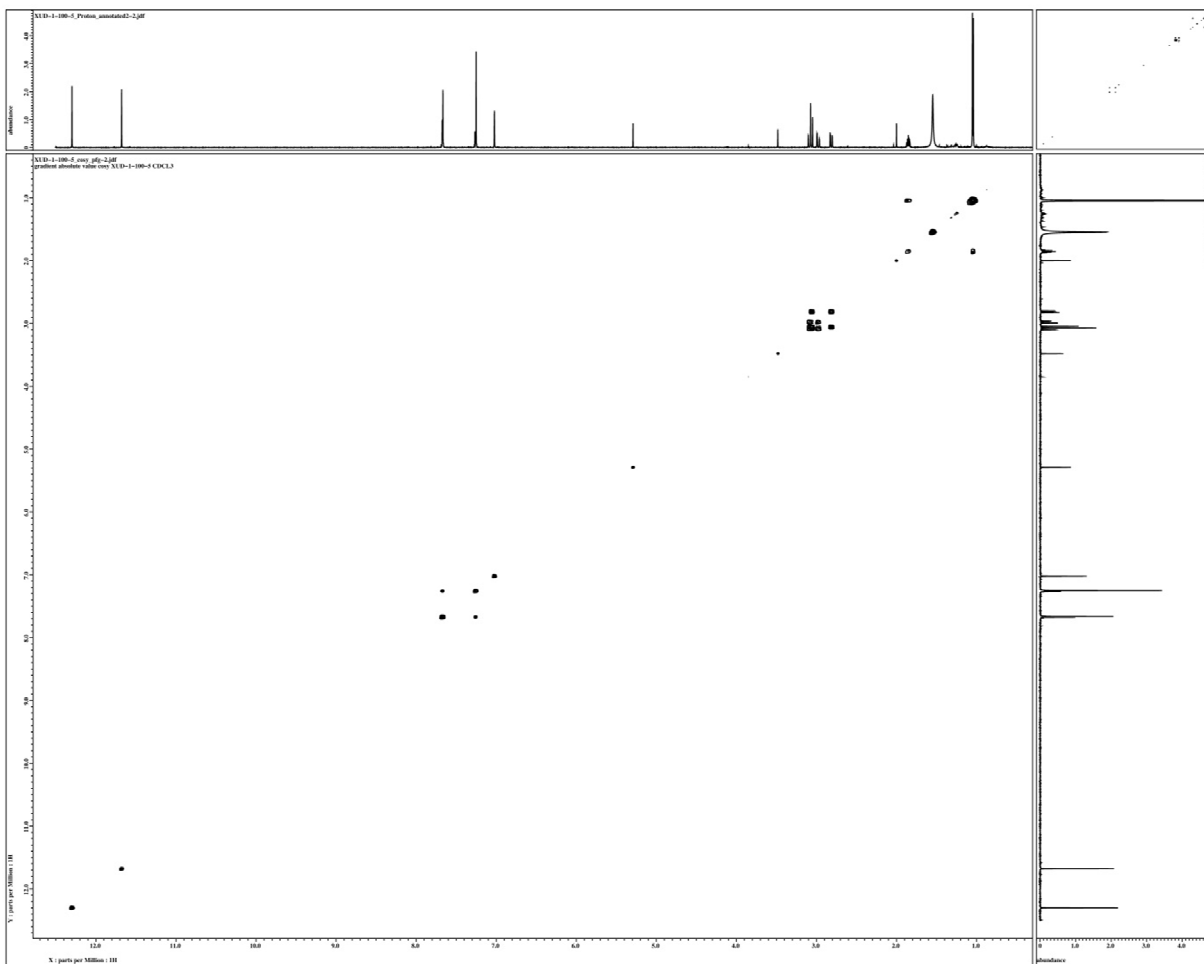

2

3

1 **Figure S17.** 2D-gHSQC spectrum of **3** in CDCl<sub>3</sub>.

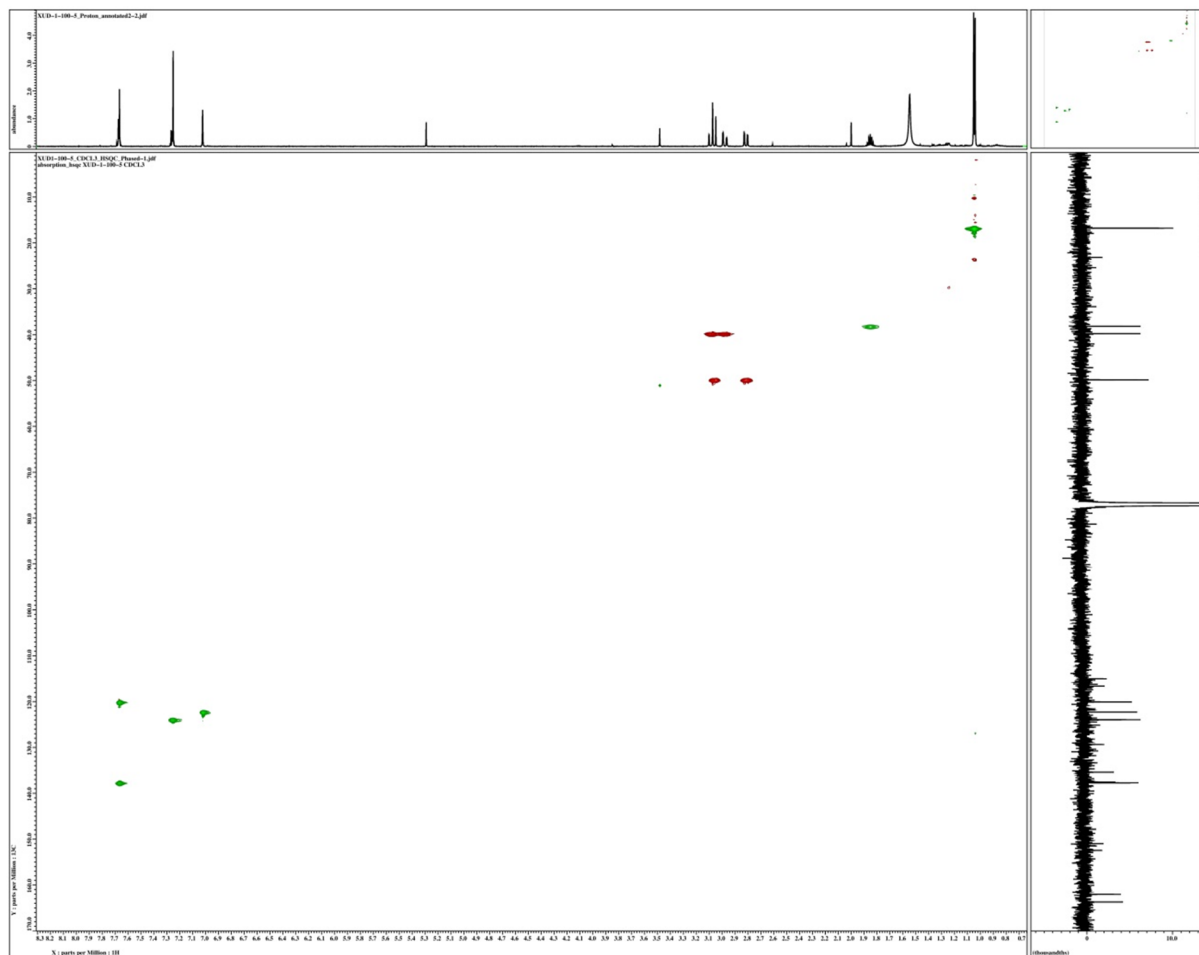

2

3

1 **Figure S18.** 2D-gHMBC spectrum of **3** in CDCl<sub>3</sub>.

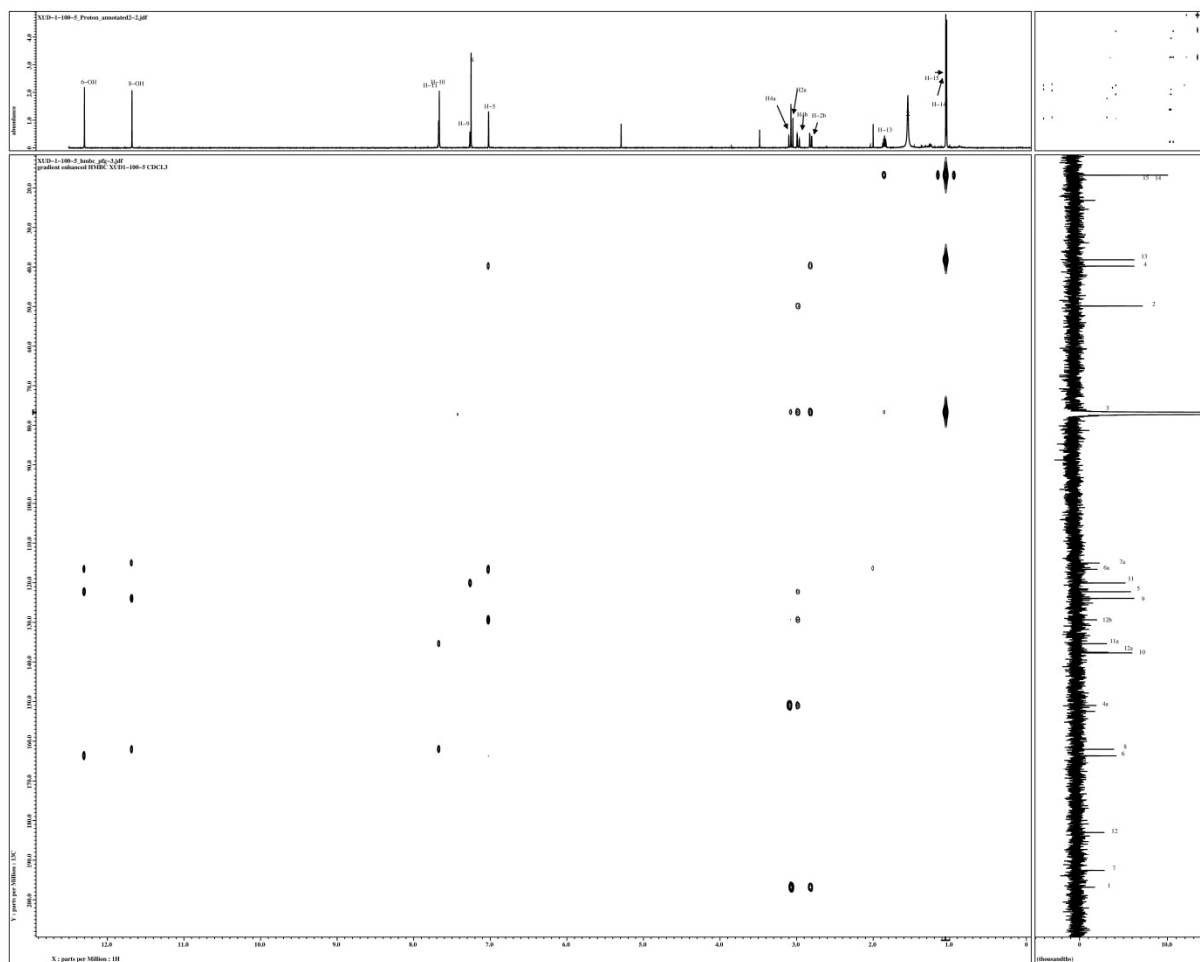

2

3
